# Supplementary material for: Structural basis for anti-CRISPR repression mediated by bacterial operon proteins Aca1 and Aca2
Source: PubMed Central journal article supplement — J Biol Chem. 2021 Oct 28;297(6):101357. doi: 10.1016/j.jbc.2021.101357 (PMC8633003; doi:10.1016/j.jbc.2021.101357), 2021-10-28
Supplement: mmc1.pdf [file mmc1.pdf]

1 **Supporting Information**

2 **Structural basis for anti-CRISPR repression mediated by bacterial operon proteins Aca1 and**  
3 **Aca2**

4  
5 **Yanhong Liu<sup>1,2¶</sup>, Linsheng Zhang<sup>2¶</sup>, Maochao Guo<sup>2</sup>, Liu Chen<sup>2</sup>, Baixing Wu<sup>3\*</sup>, Hongda Huang<sup>2\*</sup>**  
6

7 <sup>1</sup> School of Life Science and Technology, Harbin Institute of Technology, Harbin 150080, China

8 <sup>2</sup> Key Laboratory of Molecular Design for Plant Cell Factory of Guangdong Higher Education  
9 Institutes, Department of Biology, School of Life Sciences, Southern University of Science and  
10 Technology, Shenzhen 518055, China

11 <sup>3</sup> Guangdong Provincial Key Laboratory of Malignant Tumor Epigenetics and Gene Regulation,  
12 Guangdong-Hong Kong Joint Laboratory for RNA Medicine, RNA Biomedical Institute, Medical  
13 Research Center, Sun Yat-Sen Memorial Hospital, Sun Yat-Sen University, Guangzhou, China 510120

14 <sup>¶</sup>These authors contributed equally to this work.

15 \* **Corresponding authors**

16 Email addresses [huanghd@sustech.edu.cn](mailto:huanghd@sustech.edu.cn) (H.H.) and [wubx28@mail.sysu.edu.cn](mailto:wubx28@mail.sysu.edu.cn) (B.W.)  
17

---

18

19

20

21

22

23

24

25

26

27

28

29

30

31

32

33

34

35

36

37  
38  
39

**Supplementary Table 1.** DNA substrates for crystallization and ITC experiments.

---

**DNA substrates for crystallization**

| Name                            | Sequence                                                                    |
|---------------------------------|-----------------------------------------------------------------------------|
| 19-bp 5'-overhang JBD30 IR2 DNA | 5' -TATAGGCACAATGTGCCTAA -3'<br>3' - TATCCGTGTTACACGGATTA-5'                |
| 26-bp 5'-overhang ZF40-IR1 DNA  | 5' -TTGCTTGTTCGCGATTGCGAACATATA -3'<br>3' - ACGAACAAAGCGCTAACGCTTGTATATA-5' |

**DNA substrates for ITC experiments**

| Name               | Sequence                                                               |
|--------------------|------------------------------------------------------------------------|
| 17-bp IR2          | 5' -TAGGCACAATGTGCCTA-3'<br>3' -ATCCGTGTTACACGGAT-5'                   |
| 19-bp IR2          | 5' -TTAGGCACAATGTGCCTAA-3'<br>3' -AATCCGTGTTACACGGATT-5'               |
| 21-bp IR2          | 5' -ATTAGGCACAATGTGCCTAAT-3'<br>3' -TAATCCGTGTTACACGGATTA-5'           |
| 21-bp IR1          | 5' -AAGCGGCACACTGTGCCTATT-3'<br>3' -TTCGCCGTGTGACACGGATAA-5'           |
| 23-bp IR2          | 5' -AATTAGGCACAATGTGCCTAATC-3'<br>3' -TTAATCCGTGTTACACGGATTAG-5'       |
| 26-bp ZF40-IR1 DNA | 5' -TGCTTGTTCGCGATTGCGAACATATA-3'<br>3' -ACGAACAAGCGCTAACGCTTGTATAT-5' |

---

40  
41  
42  
43  
44  
45  
46  
47  
48  
49  
50  
51  
52  
53  
54  
55  
56  
57  
58  
59  
60  
61

62  
63

**Supplementary Table 2.** Thermodynamic parameters of ITC experiments.

| DNA           | Protein   | <i>N</i> | <i>K<sub>d</sub></i><br>(nM) | $\Delta H$<br>(cal/mol) | $\Delta S$<br>(cal/mol/K) |
|---------------|-----------|----------|------------------------------|-------------------------|---------------------------|
| 21-bp IR2     | Aca1 wt   | 1.00*    | 74.1                         | -7450                   | 7.64                      |
| 21-bp IR2     | R44A      |          | N.D.                         |                         |                           |
| 21-bp IR2     | R47A      |          | N.D.                         |                         |                           |
| 21-bp IR2     | V45A      | 1.00     | 363.6                        | -4982                   | 12.8                      |
| 21-bp IR2     | Y48A      | 1.00     | 2857.1                       | 4383                    | 40.1                      |
| 21-bp IR2     | R59A      |          | N.D.                         |                         |                           |
| 21-bp IR2     | R22A/Q32A |          | N.D.                         |                         |                           |
| 17-bp IR2     | Aca1 wt   |          | N.D.                         |                         |                           |
| 19-bp IR2     | Aca1 wt   | 1.00     | 740.7                        | -9239                   | -2.93                     |
| 23-bp IR2     | Aca1 wt   | 1.00     | 32.2                         | -4346                   | 19.7                      |
| 21-bp IR1     | Aca1 wt   | 1.00     | 53.2                         | -7290                   | 8.85                      |
| 21-bp IR2     | S42A      |          | N.D.                         |                         |                           |
| 21-bp IR2     | S42G      | 1.00     | 59.2                         | -12250                  | -8.0                      |
| 21-bp IR2     | Y49A      |          | W.B.                         |                         |                           |
| 26-bp ZF40IR1 | Aca2 wt   | 1.00     | 2.8                          | -34990                  | -78.2                     |
| 26-bp ZF40IR1 | Aca2 R30A |          | N.D.                         |                         |                           |
| 26-bp ZF40IR1 | Aca2 Q33A | 1.00     | 37.2                         | -14930                  | -16.1                     |
| 26-bp ZF40IR1 | Aca2 Y34A |          | N.D.                         |                         |                           |
| 26-bp ZF40IR1 | Aca2 R39A |          | N.D.                         |                         |                           |

64 N.D.: Non-detectable. W.B.: Weak binding. Please note that all raw data of the ITC experiments are  
65 shown in **Supplementary Figures 5A-F and 6A-H**.

66 \* As the concentrations of the Aca proteins might be intrinsically not determined accurately, or the  
67 recombinant proteins might be not 100% active, we fixed the *N*=1 during data fitting to get better  
68 estimation of *K<sub>d</sub>* values.

69  
70  
71  
72  
73  
74  
75  
76  
77  
78  
79  
80  
81  
82  
83  
84  
85  
86

87 **Figures and Figure legends**

88

89

**A**

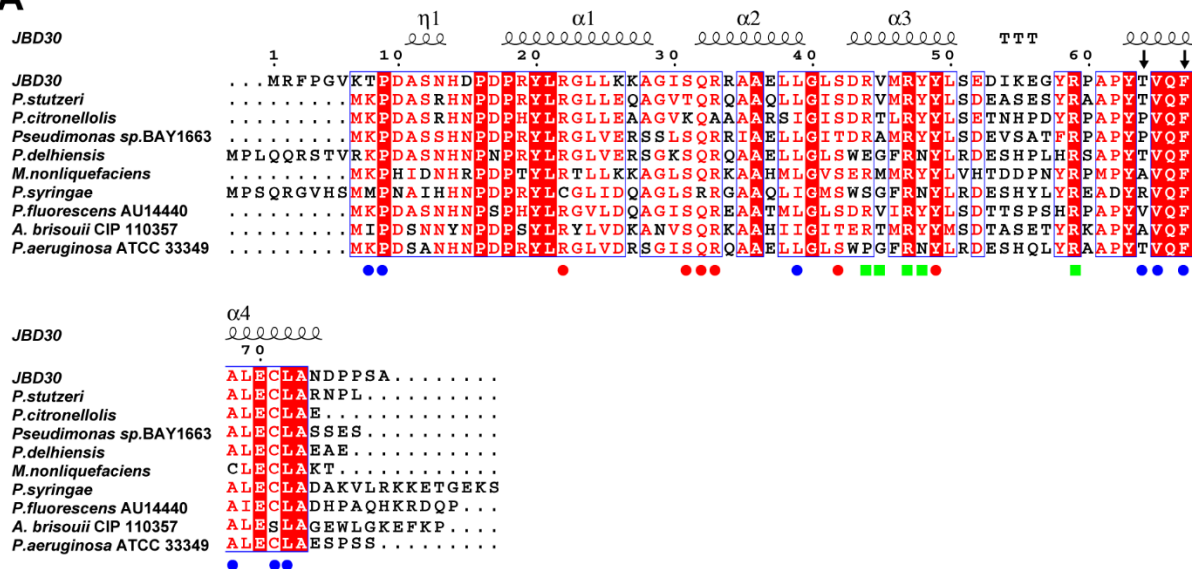

90

91

92

93 **Supplementary Figure 1. Sequence alignment of JBD30 Aca1 with its homologs from different**  
 94 **bacteria.** (A) Under alignment, the residues involved in dimer formation are indicated with blue  
 95 circles, while the residues interact with the DNA backbone and bases are indicated with red circles  
 96 and green rectangles, respectively. Secondary structures of Aca1 from Pseudomonas phage JBD30 are  
 97 shown on top of the alignment. The two residues Thr64 and Phe67 selected for the double mutant  
 98 T64D/F67D in Fig. 1D are indicated with arrows.

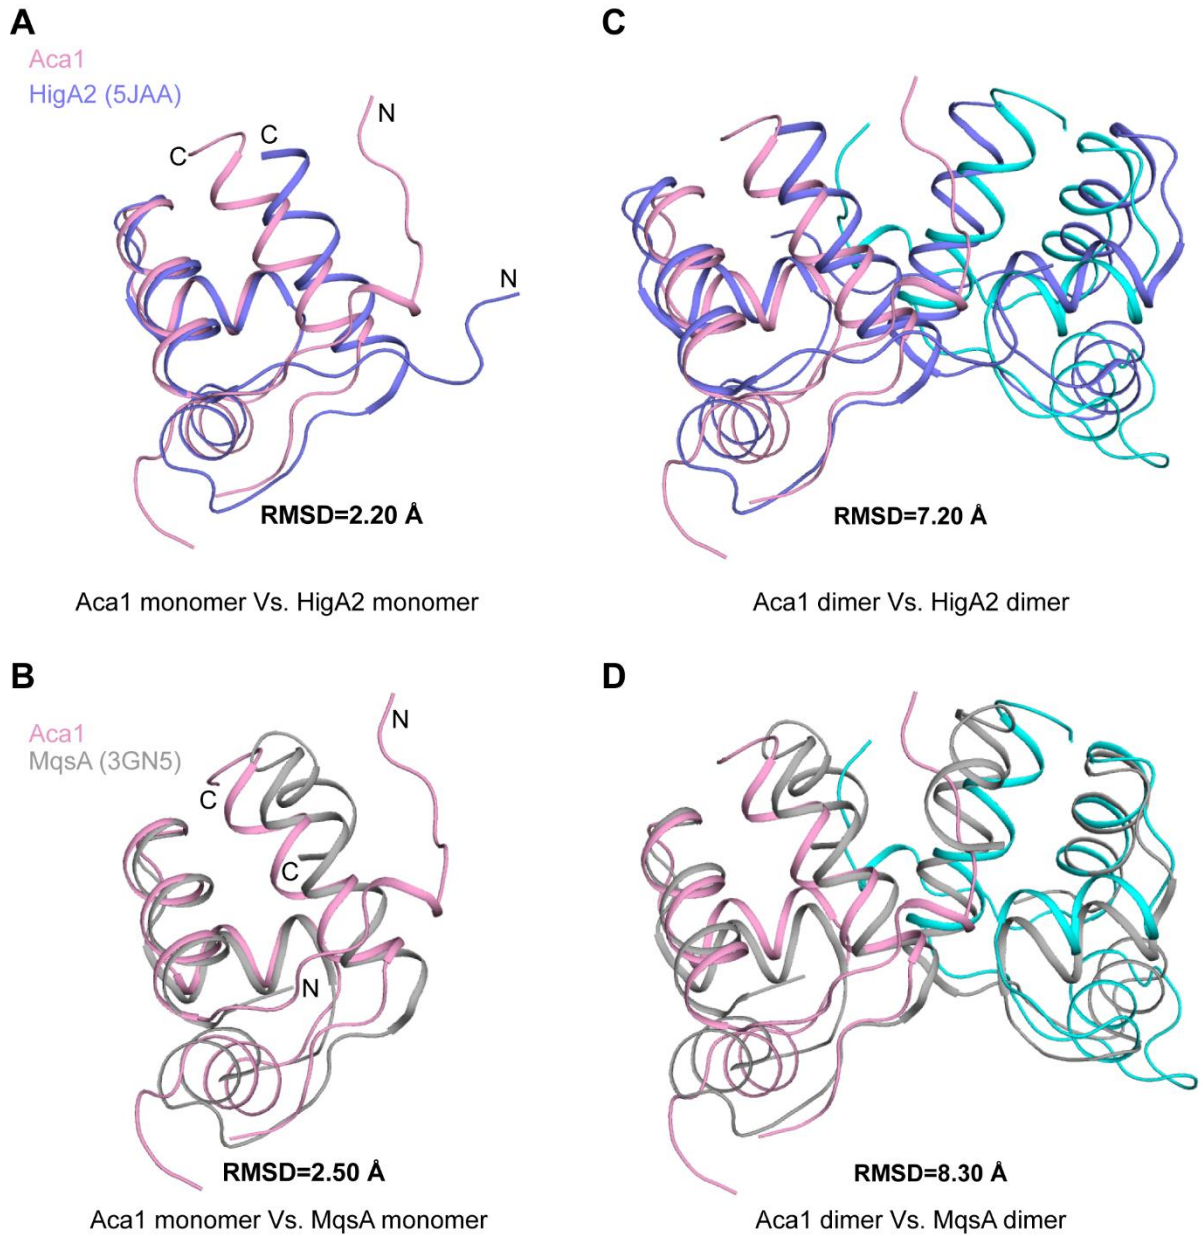

99

100

101 **Supplementary Figure 2. Structural comparisons of Aca1 with the *Vibrio cholerae* antitoxin and**  
 102 **autorepressor HigA2 and the *Escherichia coli* antitoxin and transcription repressor MqsA. (A)**  
 103 **Superposition of Aca1 monomer with HigA2 monomer (PDB ID: 5JAA; Z-score 7.5; 2.20 Å RMSD**  
 104 **for 61 C $\alpha$  atoms; Sequence identity 11%). (B) Superposition of Aca1 monomer with MqsA monomer**  
 105 **(PDB ID: 3GN5; Z-score 6.9; 2.50 Å RMSD for 63 C $\alpha$  atoms; Sequence identity 17%). (C)**  
 106 **Superposition of Aca1 dimer with HigA2 dimer (RMSD 7.20 Å). (D) Superposition of Aca1 dimer**  
 107 **with MqsA dimer (RMSD 8.30 Å).**

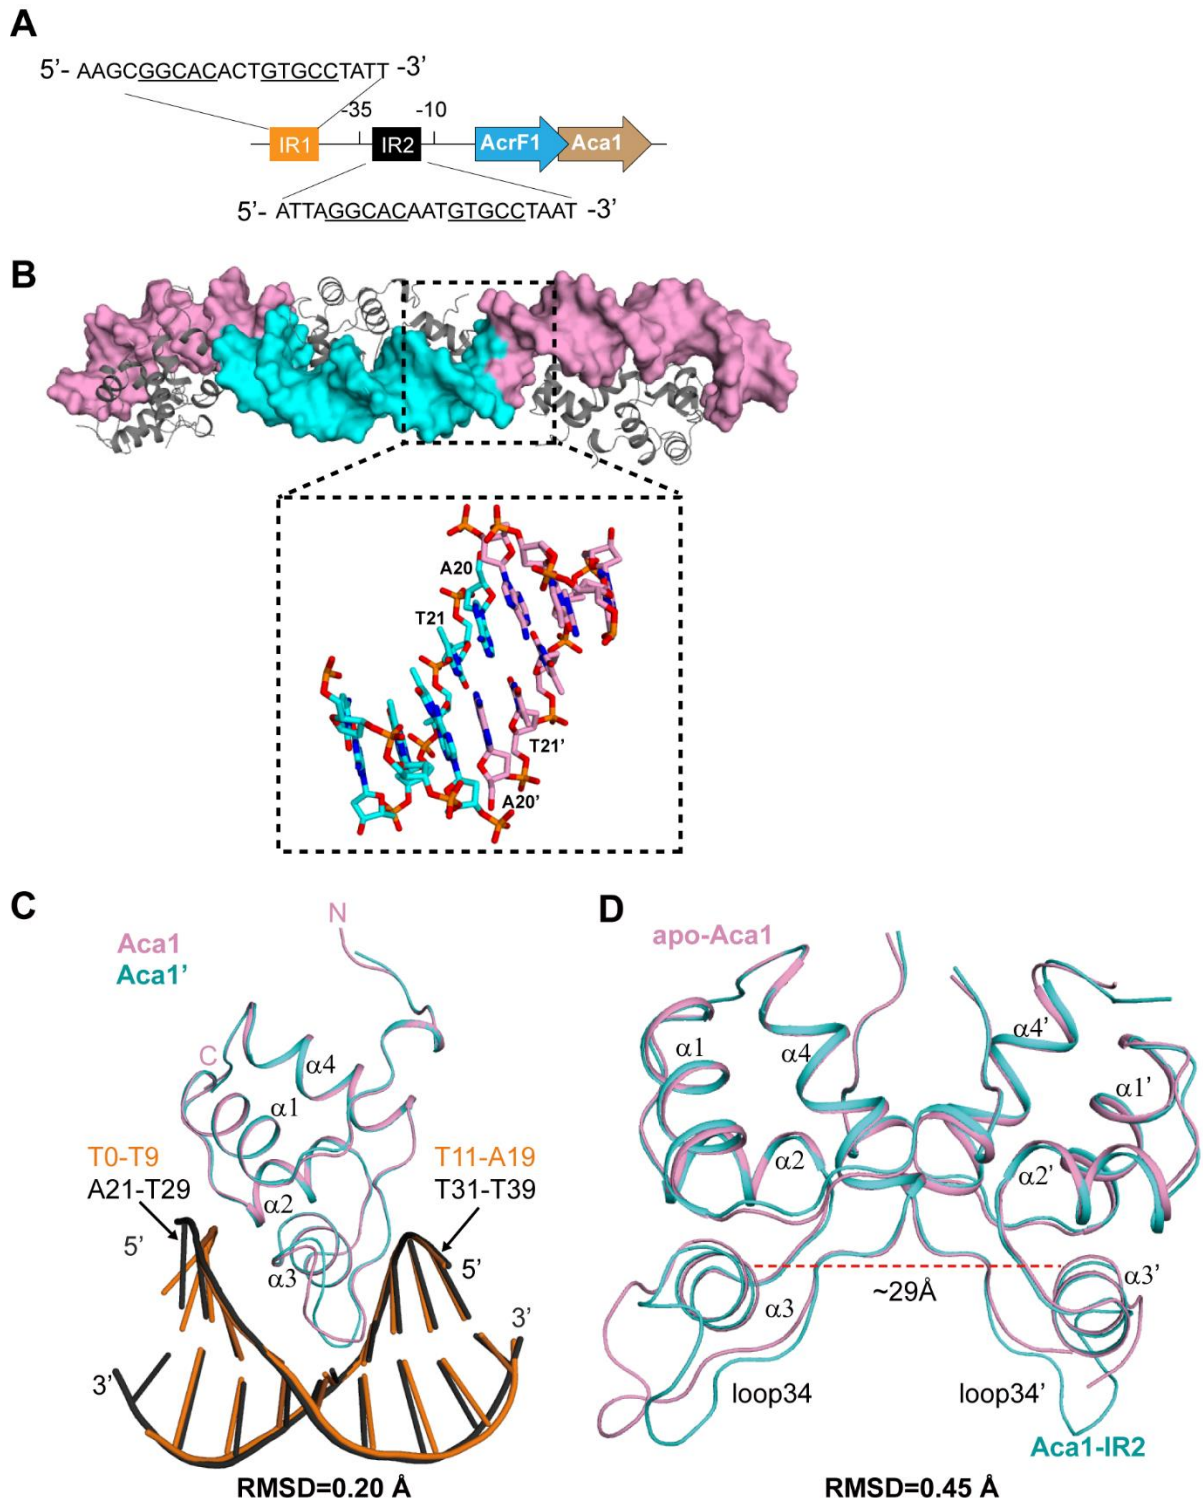

108  
109  
110  
111  
112  
113  
114  
115  
116

**Supplementary Figure 3. Aca1 forms a rigid homodimer.** (A) Schematic representation of the *acrIF1-acal* operon. (B) A cartoon view highlighted that the 5' overhangs facilitate crystal packing in the symmetric mates. (C) Superimposition of the two symmetric halves from the Aca1-IR2 complex structure, revealing little differences. (D) Superimposition of the structures of apo Aca1 and Aca1-IR2 DNA complex, highlighted little differences with small adjustments in the loops 34 and 34'.



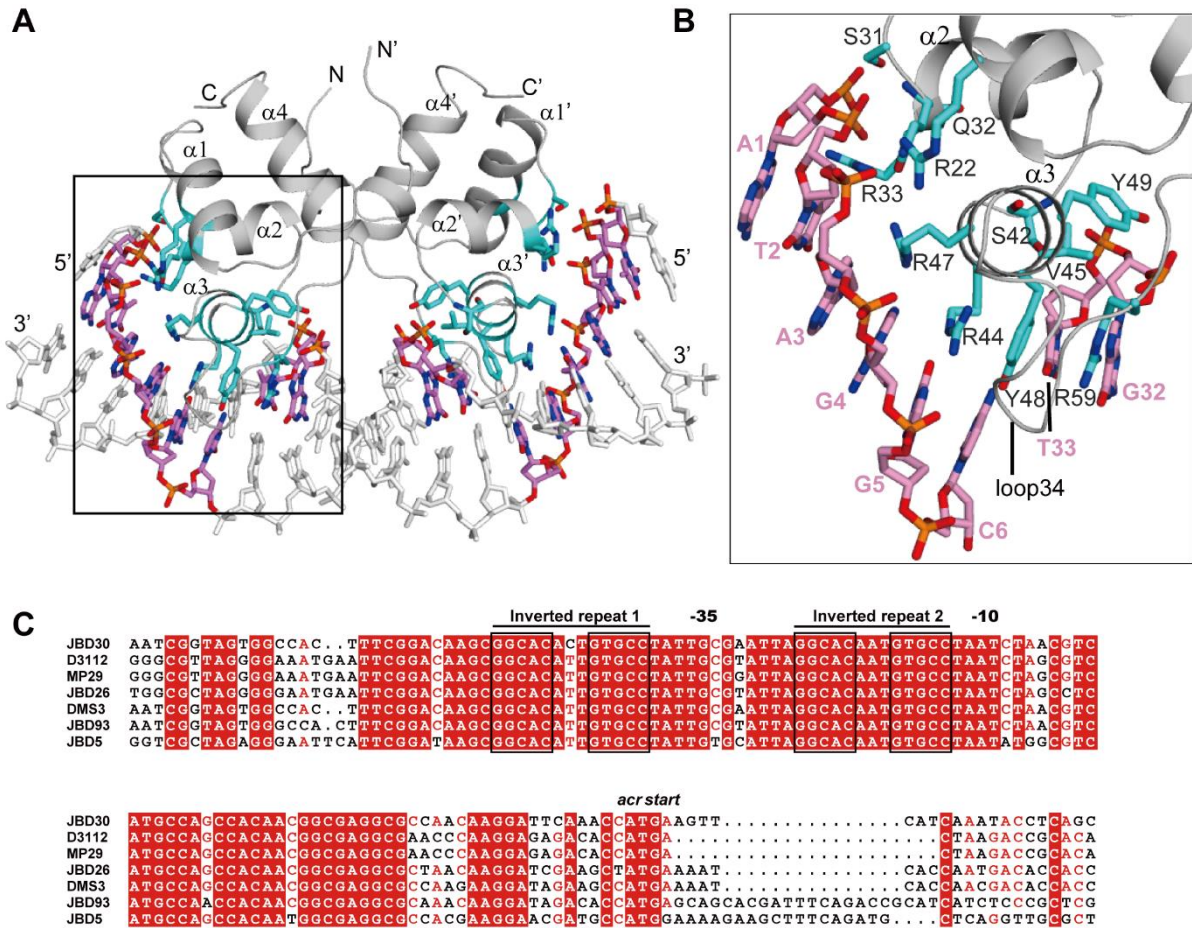

117  
118  
119  
120  
121  
122  
123  
124  
125  
126

**Supplementary Figure 4. Interactions of Aca1 with IR2 DNA.** (A-B) A 3D view of the overall interactions between Aca1 and IR2 DNA. Panel B is the zoom in view on the DNA binding interface of one Aca1 protomer. (C) DNA sequence alignment of the promoter regions of the *acr-acal* operons from phages JBD30 and the other phages. Black line on top of the alignment indicated the inverted repeats (IR2 and IR1), and the core motif involved in specific recognitions are indicated with black boxes.

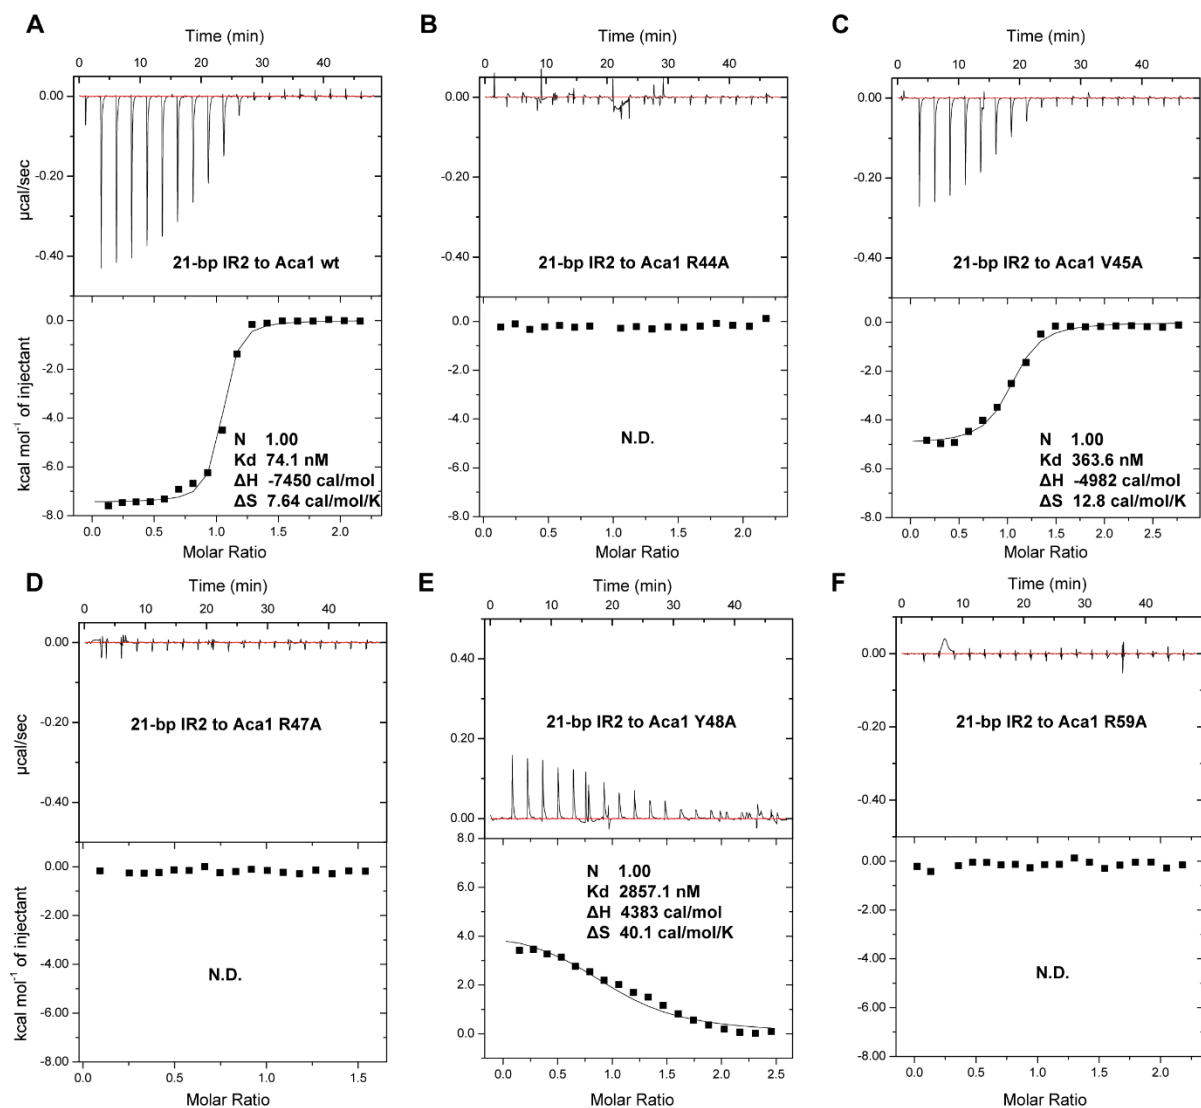

127

128

129 **Supplementary Figure 5. ITC results corresponding to the main Fig. 3.** (A-F) ITC results of wild-  
 130 type Aca1 and mutants with the 21-bp blunt-end IR2 DNA. The upper of each panel is the raw data of  
 131 heat pulses resulting from each injection, whereas the lower of each panel is the integrated heat pulses  
 132 which are normalized at per mole of injectant and as a function of molar ratio. N.D., not detected.



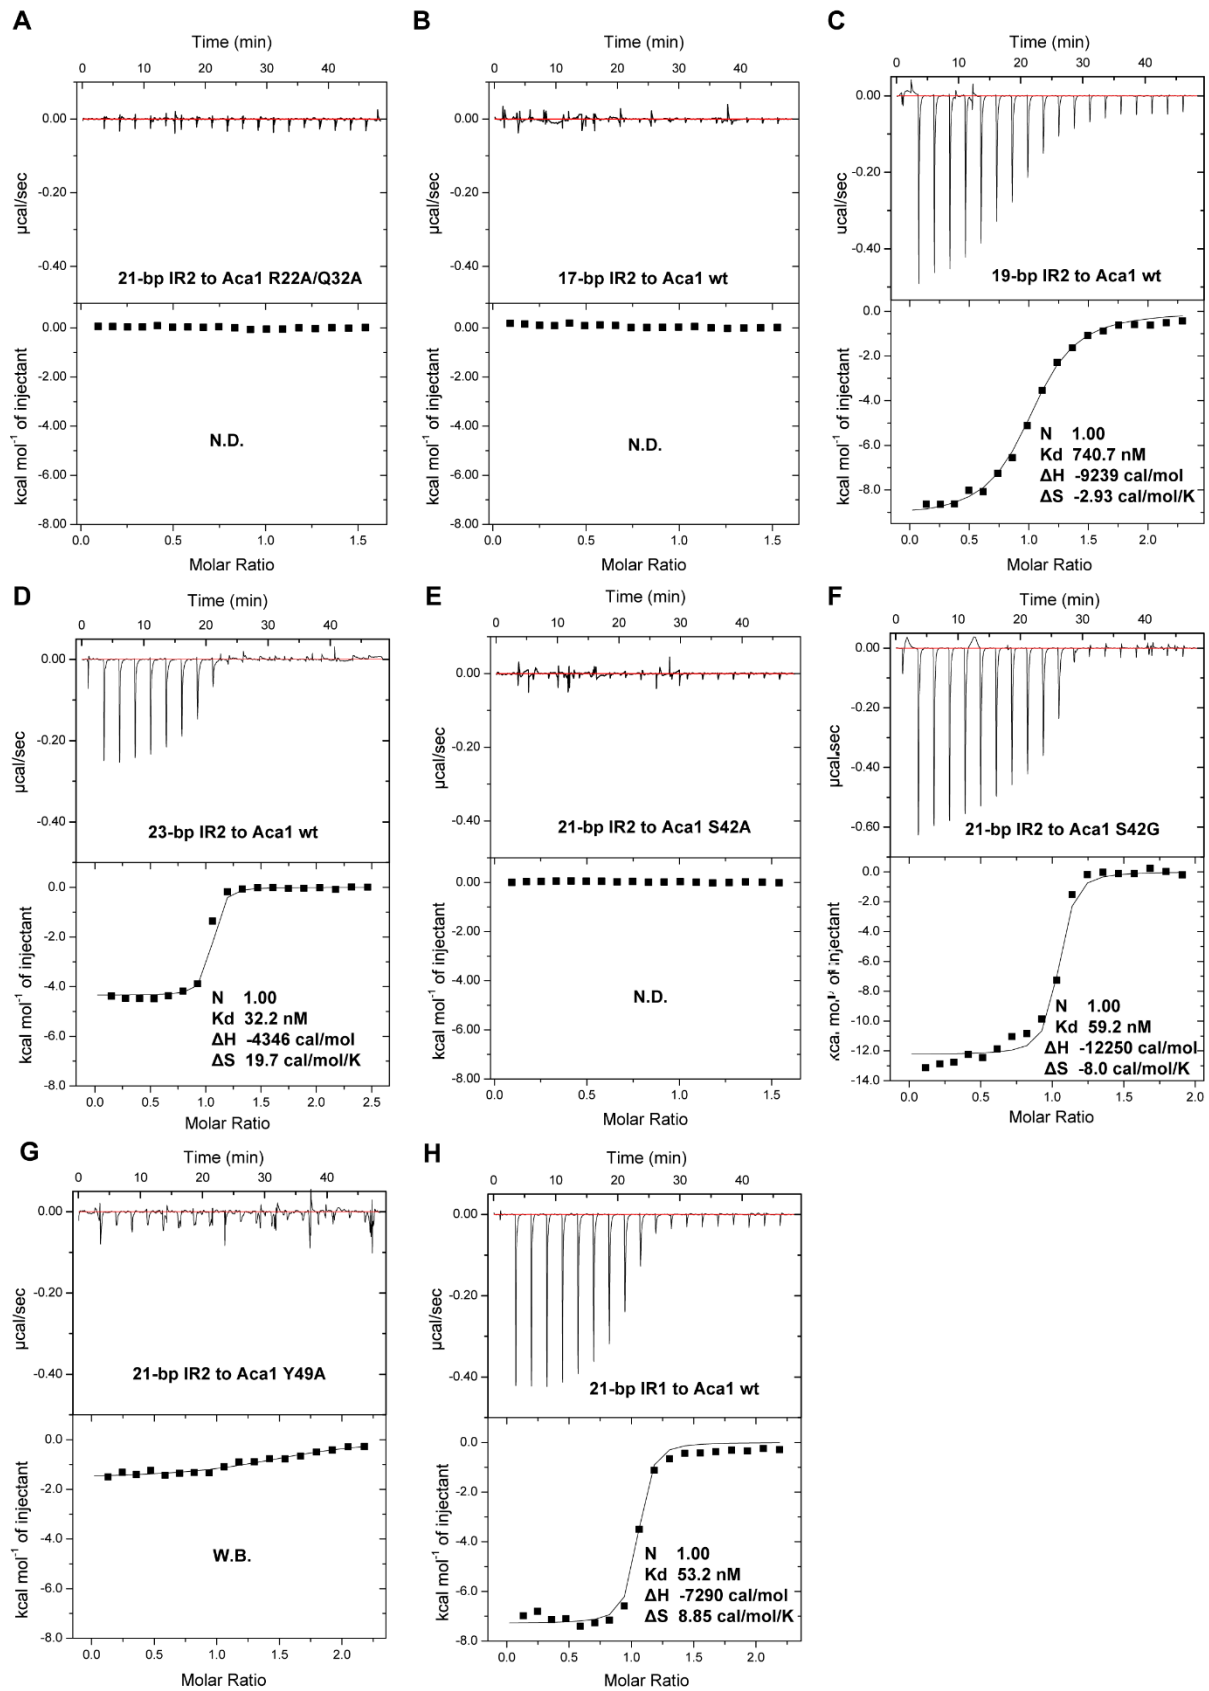

133  
134

135 **Supplementary Figure 6. ITC results corresponding to the main Fig. 3.** (A-H) The upper of each  
136 panel is the raw data of heat pulses resulting from each injection, whereas the lower of each panel is  
137 the integrated heat pulses which are normalized at per mole of injectant and as a function of molar  
138 ratio. Panel A, ITC results of the Aca1 R22A/Q32A mutant with the 21-bp IR2 DNA; Panels B-D,

139 ITC results of the IR2 DNA with different length of flanking regions to wild-type Aca1; Panels E-G,  
140 ITC results of Aca1 mutants S42A, S42G and Y49A with the 21-bp IR2 DNA; Panels H, ITC results  
141 of the 21-bp IR1 DNA to wild-type Aca1. N.D., not detected; W.B., week binding.  
142

143

144

145

146

147

148

149

150

151

152

153

154

155

156

157

158

159

160

161

162

163

164

165

166

167

168

169

170

171

172

173

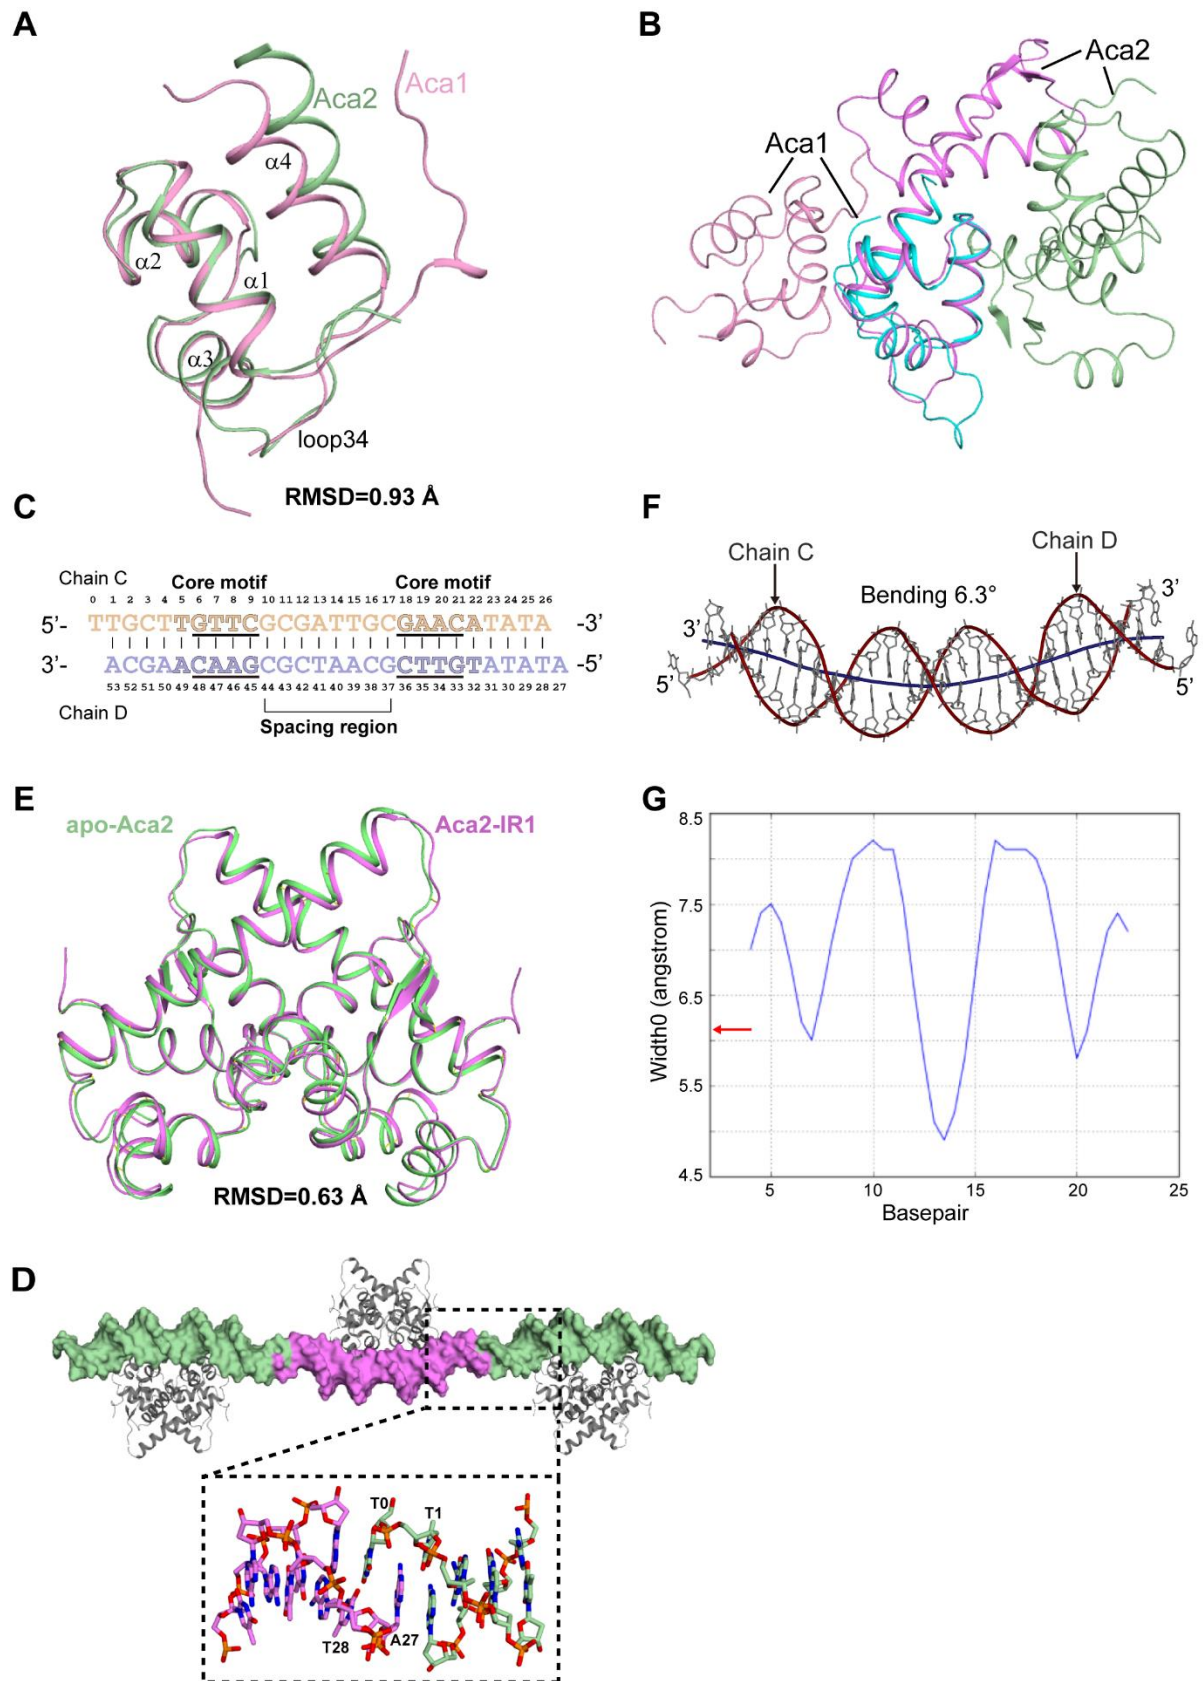

174

175

176 **Supplementary Figure 7. Aca2 bind to the DNA target by the same element with Aca1.** (A)  
 177 Superposition of the HTH domains of Aca1 and Aca2. The Aca1 and Aca2 are colored in pink and  
 178 pale green, respectively. (B) Comparison of Aca2 with Aca1 shows mirrored symmetry. (C) DNA

179 sequences used for co-crystallization with Aca2 and ITC experiments. (D) A cartoon view highlighted  
180 that the 5' overhangs facilitate crystal packing in the symmetry mates. (E) Superimposition of the  
181 structures of apo Aca2 and Aca2-IR1 DNA complex with small RMSD of 0.63 Å. (F) Bent  
182 conformation of the IR1 DNA. The helical axis of curvature is highlighted with a dark blue line  
183 through the center of DNA. (G) The blue curve represents variation of the minor groove widths (Å)  
184 along the Aca2 bound IR1 DNA. The red arrow denotes the widths of minor groove in a canonical B-  
185 form DNA. Both panels E and F are generated using the program Curves+.

186  
187  
188  
189  
190  
191  
192  
193  
194  
195  
196  
197  
198  
199  
200

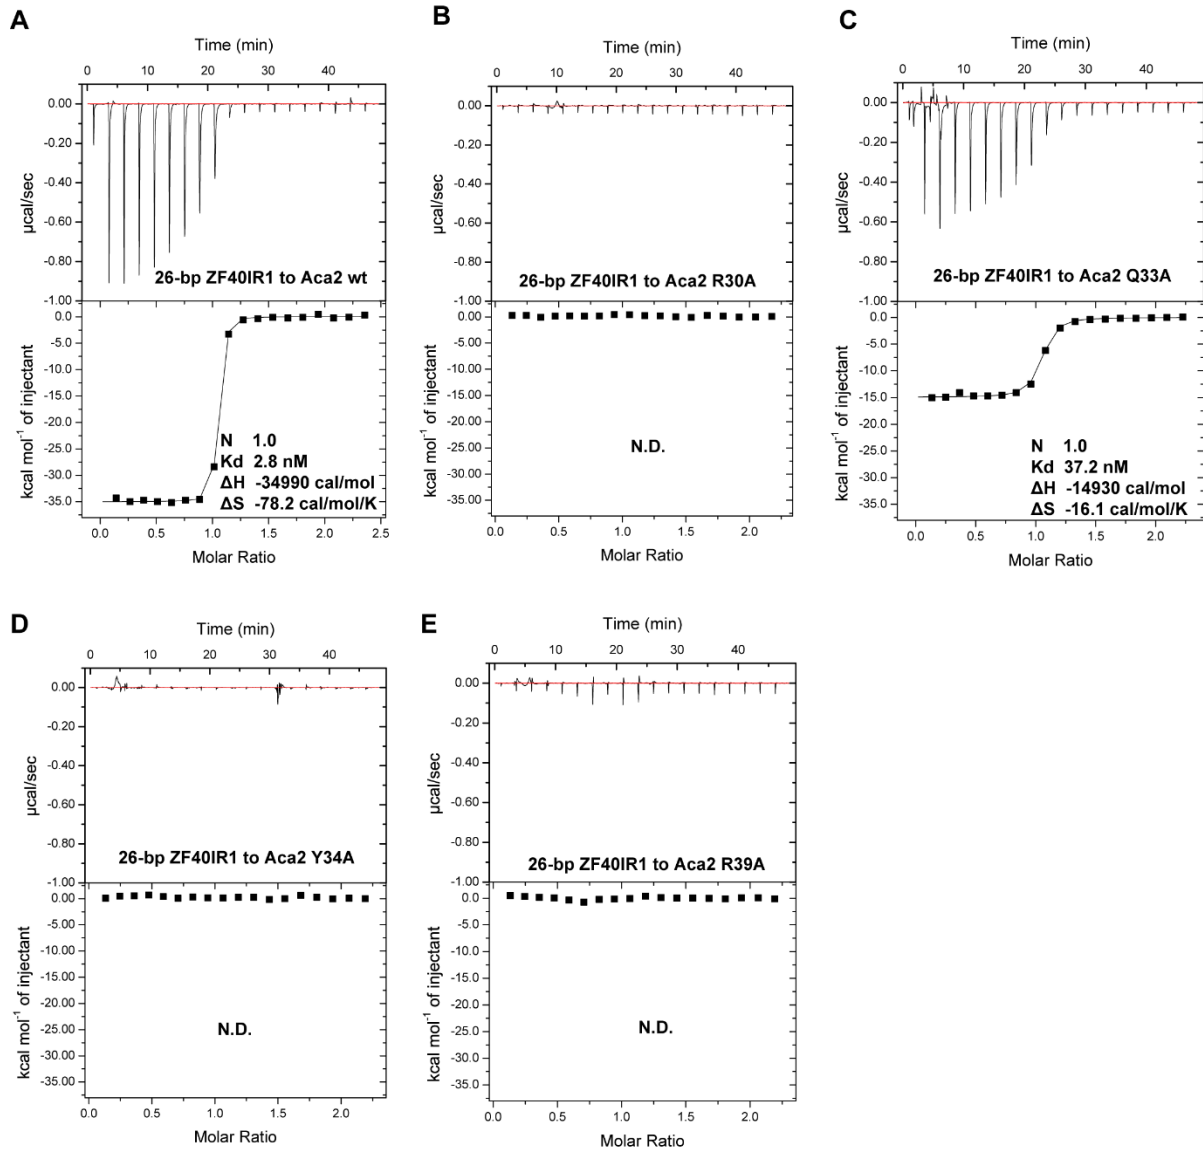

201

202

203 **Supplementary Figure 8. ITC results of Aca2 and its mutants with target DNA. (A-E) The raw**

204 **data of ITC results corresponding to the main Fig. 6I. N.D., not detected.**

205

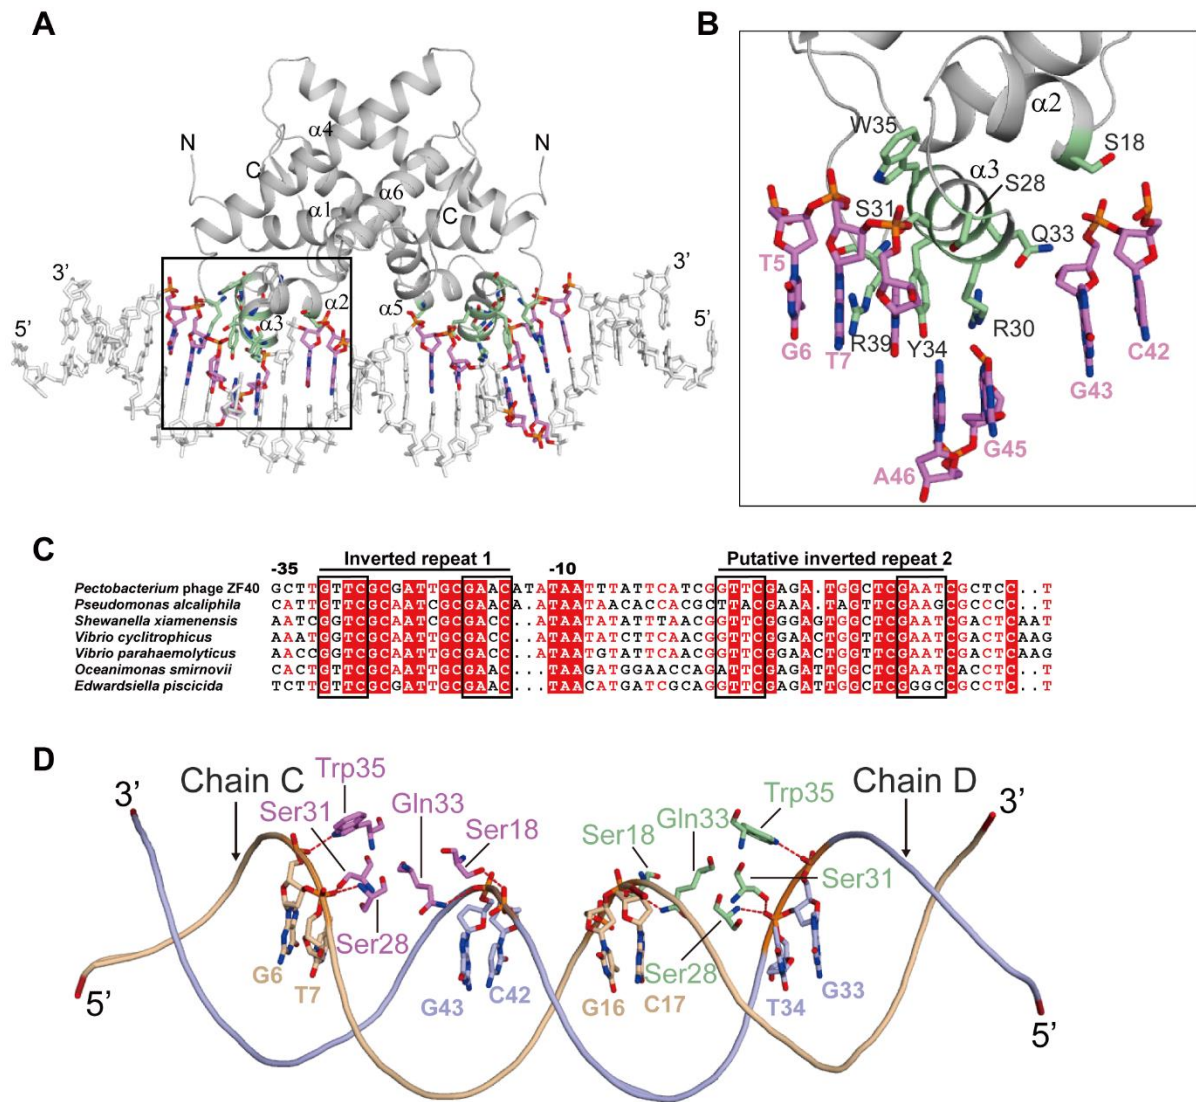

206  
207  
208  
209  
210  
211  
212  
213  
214  
215  
216  
217

**Supplementary Figure 9. Interactions of Aca2 with IR1 DNA.** (A-B) A 3D view of the overall interactions between Aca2 and IR1 DNA. Panel B is the zoom in view on the DNA binding interface of one Aca2 protomer. (C) DNA sequence alignment of the promoter regions of different *acr-aca2* operons. Black line on top of the alignment indicated the inverted repeat1 (IR1) and the putative inverted repeat (IR2). The core motifs involved in specific recognitions are indicated with black boxes. (D) Some backbone phosphate groups in core motifs and spacing region of IR1 DNA are also recognized by the Aca2 dimer. Hydrogen bonds are shown in red dash lines, the residues and nucleotides involved in interactions are shown in sticks representation.



**A**

PDB Code: 1S4K

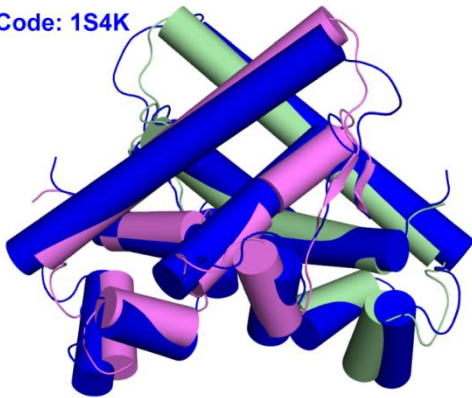

RMSD=1.09

**B**

PDB Code: 2OX6

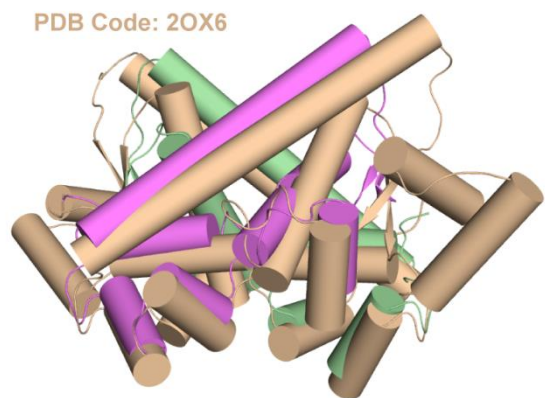

RMSD=1.11

218  
219  
220  
221  
222  
223  
224  
225

**Supplementary Figure 10. Quaternary structure comparison of Aca2 with YdiL and SO\_3848.**  
(A) Superposition of Aca2 with YdiL (PDB ID: 1S4K). (B) Superposition of Aca2 with SO\_3848  
(PDB ID: 2OX6).
